# Supplementary material
Source: publisher figshare collection journal article supplement (https://tandf.figshare.com/ndownloader/files/15136145)
Supplement: Supplementary file 1 [file 15136145]

Supplemental Table 1. Causes of death among patients with moderate or severe mitral regurgitation at baseline who underwent CABG versus CABG+SVR with or without mitral valve repair.

| Outcome | CABG Only  (N=50) | CABG+MVRe  (N=44) | CABG+SVR Only  (N=62) | CABG+SVR+MVRe  (N=48) | Total  (N=204) |
| --- | --- | --- | --- | --- | --- |
| All-cause death | 21 (42%) | 10 (23%) | 21 (34%) | 20 (42%) | 72 (35%) |
| Cardiovascular death | 15 (30%) | 10 (23%) | 17 (27%) | 18 (38%) | 60 (29%) |

CABG, coronary artery bypass grafting; MVRe, mitral valve repair; SVR, surgical ventricular reconstruction
